# Supplementary material
Source: PubMed Central journal article supplement (PMC5706464)
Supplement: NIHMS827743-supplement-supplemental_file.pdf [file NIHMS827743-supplement-supplemental_file.pdf]

**Stabilization of  $\alpha$ -Synuclein Fibril Clusters Prevents Fragmentation and Reduces Seeding Activity and Toxicity, Huy T. Lam, Michael C. Graber, Katherine A. Gentry, Jan Bieschke**

**Supplementary Figure 1**

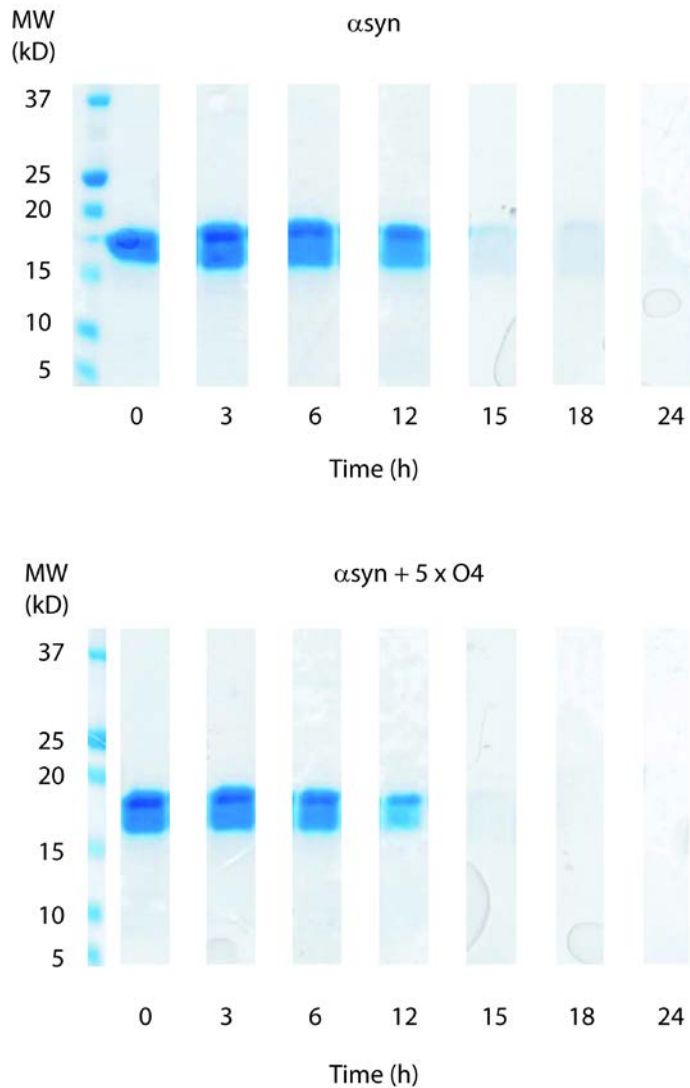

Supplementary Figure 1:  $\alpha$ Syn samples (45 $\mu$ M) were incubated under constant shaking at 37°C for the indicated time intervals and then centrifuged at 70k RPM (205,000 x g) for 30 minutes. The supernatant was then analyzed by SDS-PAGE and stained by Coomassie brilliant blue. All  $\alpha$ syn ran as monomer. Monomer band intensities were analyzed densitometrically.
